# Supplementary material
Source: PubMed Central journal article supplement (PMC7953832)
Supplement: NIHMS1636709-supplement-1.pdf [file NIHMS1636709-supplement-1.pdf]

Supplemental Figure 1

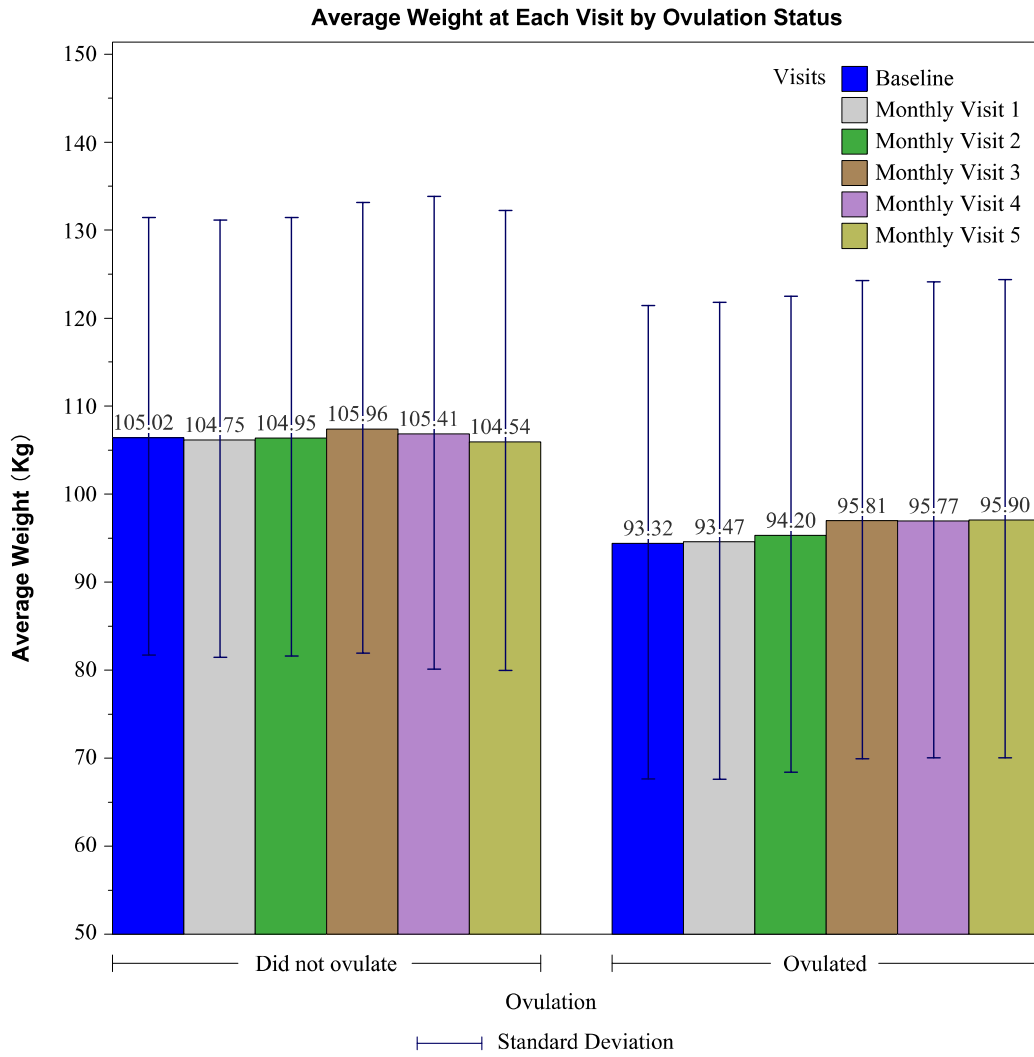

**Supplemental Table 1: Weight (kg) as a categorical or continuous variable among women with PCOS stratified by ovulation****Weight change as categorical variable:**

| Variable      | Ovulated<br>(N= 367) | Did not ovulate<br>(N= 87) | P value <sup>^</sup> |
|---------------|----------------------|----------------------------|----------------------|
| Weight Change |                      |                            | 0.42                 |
| ≤ 0KG         | 277/367 (75.5)       | 62/87 (71.3)               |                      |
| ≥ 3KG         | 90/367 (24.5)        | 25/87 (28.7)               |                      |

**Weight change as continuous variable:**

| Variable              | Ovulated<br>(N= 592)      | Did not ovulate<br>(N= 105) | P value <sup>^</sup> |
|-----------------------|---------------------------|-----------------------------|----------------------|
| Average Weight Change | 0.5 (-0.9, 2.1),<br>n=592 | 0.9 (-0.8, 2.7), n=105      | 0.05                 |

Abbreviations: PCOS, polycystic ovary syndrome

<sup>^</sup> Wilcoxon's rank-sum test, and Fisher's exact test were used where appropriate.

Supplemental Table 2: Odds ratios for predictive variables and weight gain among women with PCOS

| Variables                              | Weight Gain $\geq$ 3kg vs Weight Gain $\leq$ 0 kg |         |                        |         |
|----------------------------------------|---------------------------------------------------|---------|------------------------|---------|
|                                        | Adjusted OR (95% CL)                              | P-value | Unadjusted OR (95% CL) | P-value |
| Age (years)                            | 1.02 (0.95, 1.09)                                 | 0.62    | 0.99 (0.94, 1.05)      | 0.85    |
| BMI (kg/m <sup>2</sup> )               | 1.04 (1.01, 1.07)                                 | 0.02    | 1.01 (0.99, 1.04)      | 0.38    |
| Treatment                              |                                                   |         |                        |         |
| Clomiphene                             | 1                                                 |         | 1                      |         |
| Letrozole                              | 0.88 (0.52, 1.48)                                 | 0.63    | 0.89 (0.573, 1.37)     | 0.58    |
| Ethnic group                           |                                                   |         |                        |         |
| Hispanic or Latino                     | 1                                                 |         | 1                      |         |
| Not Hispanic or Latino                 | 1.66 (0.64, 4.24)                                 | 0.29    | 1.35 (0.71, 2.56)      | 0.36    |
| History of pregnancy                   |                                                   |         |                        |         |
| Yes                                    | 1                                                 |         | 1                      |         |
| No                                     | 0.96 (0.55, 1.68)                                 | 0.89    | 1.18 (0.75, 1.86)      | 0.47    |
| Number of months attempting conception | 0.99 (0.98, 1.01)                                 | 0.83    | 0.99 (0.99, 1.00)      | 0.11    |
| HOMA IR Score                          | 0.99 (0.98, 0.99)                                 | 0.003   | 0.99 (0.99, 0.99)      | 0.03    |
| Total Testosterone (ng/dL)             | 0.99 (0.98, 1.00)                                 | 0.15    | 0.99 (0.98, 1.00)      | 0.16    |
| Duration of Infertility                |                                                   |         |                        |         |
| <2 years                               | 1                                                 |         | 1                      |         |
| 2-4 years                              | 0.84 (0.43, 1.62)                                 | 0.59    | 0.85 (0.50, 1.43)      | 0.53    |
| >4 years                               | 0.44 (0.14, 1.38)                                 | 0.16    | 0.58 (0.34, 1.01)      | 0.06    |
| Maximum Dose                           |                                                   |         |                        |         |
| 1 Tablets                              | 1                                                 |         | 1                      |         |
| 2 Tablets                              | 0.91 (0.42, 1.94)                                 | 0.80    | 2.02 (1.04, 3.93)      | 0.04    |
| 3 Tablets                              | 1.73 (0.82, 3.67)                                 | 0.15    | 3.96 (2.21, 7.12)      | <0.001  |
| Ovulation                              |                                                   |         |                        |         |
| Yes                                    | 1                                                 |         | 1                      |         |
| No                                     | 1.57 (0.75, 3.29)                                 | 0.23    | 1.93 (1.09, 3.39)      | 0.02    |
| Treatment Cycles                       |                                                   |         |                        |         |
| 1                                      | 1                                                 |         | 1                      |         |
| 2                                      | 5.49 (0.56, 54.22)                                | 0.15    | 4.32 (0.46, 40.47)     | 0.19    |
| 3                                      | 16.04 (1.79, 143.66)                              | 0.01    | 13.33 (1.64, 108.69)   | 0.016   |
| 4                                      | 27.49 (3.03, 249.54)                              | 0.003   | 25.18 (3.16, 200.57)   | 0.002   |
| 5                                      | 21.36 (2.58, 176.86)                              | 0.005   | 22.01 (2.97, 163.05)   | 0.003   |

| Site Region |                   |      |                   |      |
|-------------|-------------------|------|-------------------|------|
| MW          | 1                 |      | 1                 |      |
| NE          | 1.01 (0.54, 1.91) | 0.97 | 1.06 (0.61, 1.83) | 0.84 |
| SE          | 0.33 (0.11, 1.02) | 0.05 | 0.55 (0.22, 1.40) | 0.21 |
| SW          | 1.26 (0.42, 3.79) | 0.68 | 0.73 (0.34, 1.57) | 0.42 |
| W           | 1.44 (0.58, 3.58) | 0.43 | 1.11 (0.52, 2.35) | 0.80 |

Abbreviations: PCOS, polycystic ovary syndrome, BMI, body mass index, MW Midwest, NE Northeast, SE Southeast, SW Southwest, W West

Potential adjustors: Age (years), BMI (kg/m<sup>2</sup>), ethnic group, treatment, history of pregnancy, number of months attempting conception, ovulation, duration of Infertility, maximum dose of clomiphene or letrozole, HOMA-IR and total testosterone level in the model.
